# Supplementary material for: Effectiveness of a Goldilocks Work intervention in childcare workers – A cluster-randomized controlled trial
Source: PubMed Central journal article supplement (PMC11057501; doi:10.5271/sjweh.4145), 2024-04-01

## Effectiveness of a Goldilocks Work intervention in childcare workers – A cluster-randomized controlled trial<sup>1</sup>

by Kathrine Greby Schmidt, MSc,<sup>2</sup> Anders Fritz Lerche, MSc, Marie Raunkjær Christensen, MSc, Charlotte Lund Rasmussen, PhD, Leon Straker, PhD, Svend Erik Mathiassen, PhD, Andreas Holtermann, PhD

1. Supplementary material
2. Correspondence to: Kathrine Greby Schmidt, The National Research Centre for the Working Environment, 2100 Copenhagen, Denmark. [E-mail: kgs@nfa.dk]

**Appendix A.** Description of intervention components that were modified due to requirements from the workplaces and to COVID-19 restrictions issued by the Danish Health Authority.

| Modification                                    | Activities planned according to the protocol                                                                                             | Activities completed                                                                                                                                                                       | Reasons for the modification made                                                                                                                                                                                                                             |
|-------------------------------------------------|------------------------------------------------------------------------------------------------------------------------------------------|--------------------------------------------------------------------------------------------------------------------------------------------------------------------------------------------|---------------------------------------------------------------------------------------------------------------------------------------------------------------------------------------------------------------------------------------------------------------|
| 1. Length of intervention                       | 10-weeks intervention period                                                                                                             | 8-weeks intervention period                                                                                                                                                                | The institutions had to remain closed for a month as part of the government's overall plan to reduce infection with COVID-19. Therefore, it was necessary to reduce the intervention period to ensure completion of data collection within the project period |
| 2. Development of Goldilocks-games              | During the first workshop, the childcare workers were planned to develop their own Goldilocks-games                                      | In total, seven Goldilocks-games was developed. We collaborated with childcare workers to co-develop three Goldilocks-games. Later we developed additional four Goldilocks-games our self. | The childcare institutions had to adhere to several restrictions including physical distancing. Therefore, it was not possible to gather the childcare workers nor the children for a face-to-face workshop                                                   |
| 3. Video material                               | It was planned to inform the childcare workers about the overall content of the Goldilocks Work Principle during a face-to-face workshop | A video with information of the overall content of the Goldilocks Work Principle and intervention content was sent individually to the childcare workers                                   |                                                                                                                                                                                                                                                               |
| 4. Visit 1: Training and start-up of Goldilocks | The childcare workers were planned to develop their own Goldilocks-games during the first face-to-face workshop                          | Teaching childcare workers and children two Goldilocks-games                                                                                                                               |                                                                                                                                                                                                                                                               |
| 5. Visit 2: Further training and implementation | It was planned that during the second face-to-face workshop to the consultant                                                            | Teaching childcare workers and children two Goldilocks-games                                                                                                                               |                                                                                                                                                                                                                                                               |

|                                                            |                                                                                                                                                                                  |                                                                                                                                           |                                                                           |
|------------------------------------------------------------|----------------------------------------------------------------------------------------------------------------------------------------------------------------------------------|-------------------------------------------------------------------------------------------------------------------------------------------|---------------------------------------------------------------------------|
| 6. Visit 3:<br>Implementation and sustaining               | and childcare workers would discuss the implementation of the Goldilocks-games, facilitate sustainability of well-functioning Goldilocks-games and modify the games if necessary | Teaching childcare workers and children three Goldilocks-games                                                                            |                                                                           |
| 7. Collection of anthropometric and technical measurements | A representative from our research group measured the anthropometric and attached the monitors                                                                                   | A manual for self-conducting anthropometric measurements and self-application of the monitors was developed and used in some institutions | External visitors were not allowed to enter in all childcare institutions |

**Appendix B.** Picture of how the poster and the colored paws were intended to be used. Each Goldilocks-game were giving its own paw color, the rows represent one intervention week and each color illustrates a specific Goldilocks-game. The children were encouraged to place a paw sticker on the poster every time they had played a Goldilocks-game.

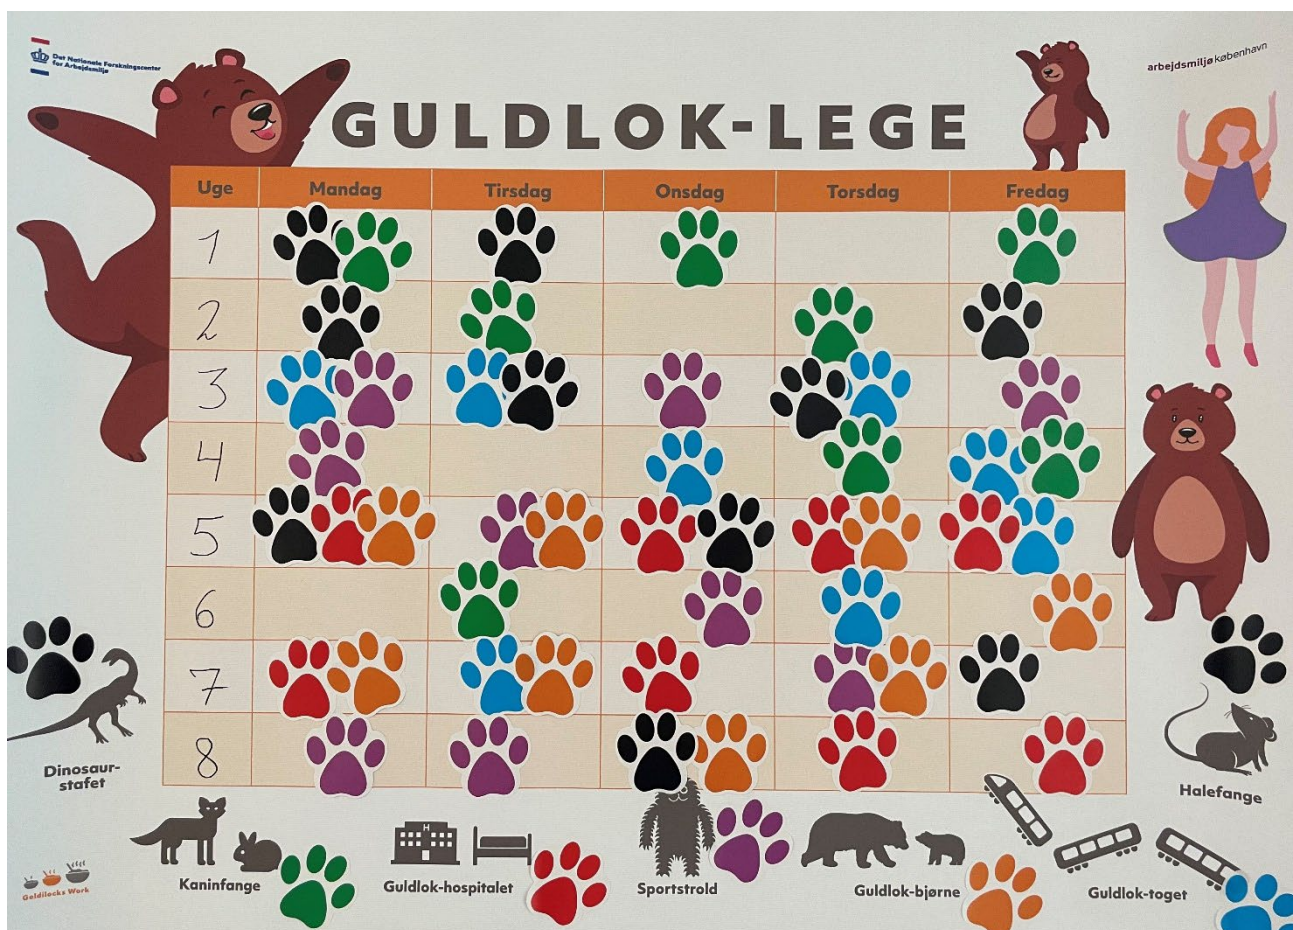

Supplement: SJWEH-50-197-S001.pdf [file SJWEH-50-197-S001.pdf]
